# Supplementary material for: The Predicted Splicing Variant c.11+5G>A in RPE65 Leads to a Reduction in mRNA Expression in a Cell-Specific Manner
Source: MDPI journal article supplement (doi:10.3390/cells11223640), 2022-11-17
Supplement: s1 [file s1]

# The Predicted Splicing Variant c.11+5G>A in *RPE65* Leads to a reduction in mRNA Expression in a Cell-Specific Manner

Irene Vázquez-Domínguez<sup>1,2</sup>, Lonneke Duijkers<sup>1</sup>, Zeinab Fadaie<sup>1,2</sup>, Eef C.W. Alaerds<sup>1</sup>, Merel A. Post<sup>3</sup>, Edwin M. van Oosten<sup>4,5</sup>, Luke O’Gorman<sup>1</sup>, Michael Kwint<sup>1</sup>, Louet Koolen<sup>6</sup>, Anita D.M. Hoogendoorn<sup>1</sup>, Hester Y. Kroes<sup>7</sup>, Christian Gilissen<sup>1,5</sup>, Frans P.M. Cremers<sup>1,2</sup>, Rob W.J. Collin<sup>1,2,#</sup>, Susanne Roosing<sup>1,2,#</sup> and Alejandro Garanto<sup>1,4,5\*</sup>.

<sup>1</sup>Department of Human Genetics, Radboud university medical center, 6525 GA, Nijmegen, The Netherlands.

<sup>2</sup>Donders Institute for Brain, Cognition and Behaviour, Radboud university medical center, 6525 GD, Nijmegen, The Netherlands.

<sup>3</sup>Department of Neurology, Donders Institute for Brain, Cognition and Behaviour, Radboud university medical center, 6525GA, Nijmegen, The Netherlands.

<sup>4</sup>Department of Pediatrics, Amalia Children’s hospital, Radboud university medical center, 6525 GA, Nijmegen, The Netherlands.

<sup>5</sup>Radboud Institute of Molecular Life Sciences (RIMLS), Radboud university medical center, 65265 GA Nijmegen, The Netherlands.

<sup>6</sup>Department of Ophthalmology, Radboud university medical center, 6525 GA, Nijmegen, The Netherlands.

<sup>7</sup>Division Laboratories, Pharmacy and Biomedical Genetics, Clinical Genetics, University Medical Center of Utrecht, 3584 CX, Utrecht, The Netherlands.

†These authors contributed equally to this work\*Corresponding author

## Supplementary material

### Index

|                                                                                                          |   |
|----------------------------------------------------------------------------------------------------------|---|
| Supplementary tables.....                                                                                | 2 |
| Table S1. List of primers employed in this work.....                                                     | 2 |
| Table S2. List and combinations of antibodies used for immunocytochemistry.....                          | 4 |
| Table S3. List of antibodies used for Western blot analysis study.....                                   | 4 |
| Table S4. Summary of the protein analysis of the ~35 kDa and 65 kDa protein band from the IP of RPE65... | 5 |
| Supplementary figures.....                                                                               | 8 |
| Figure S1. Peptide coverage of RPE65 in for the 65 kDa band. ....                                        | 8 |
| Figure S2. RT-PCR from exon 1 to 3 of the <i>RPE65</i> entry clones in different cell lines. ....        | 9 |

## Supplementary tables.

**Table S1. List of primers employed in this work.**

| Name                                               | Sequence with <u>tag/tails</u> (5'-3')                      | Sequence without tag/tails (5'-3')       | Tm(°C) | PCR product (bp) |
|----------------------------------------------------|-------------------------------------------------------------|------------------------------------------|--------|------------------|
| <b><u>Splicing vectors</u></b>                     |                                                             |                                          |        |                  |
| <i>RPE65_5'UTR_Fwd</i>                             | <u>GGGGACAAGTTTGTACAAAAAAGCAGGCTTC</u> CAGAGAATGGTGCCAAGGTC | CAGAGAATGGTGCCAAGGTC                     | 65.1   | 3,832            |
| <i>RPE65_intron3_Rev</i>                           | <u>GGGGACCACTTTGTACAAGAAAGCTGGGTG</u> TTGCCAAGGTTACCTCCTA   | TTGCCAAGGTTACCTCCTA                      | 63.7   |                  |
| <i>SDMut_RPE65_c.11+5_Fwd</i>                      | n/a                                                         | CTGGAAGAAAATGTCTATCCAGTAAGTATCTCTGGGAGAC | 73.8   | 3,832            |
| <i>SDMut_RPE65_c.11+5_Rev</i>                      | n/a                                                         | CTGGAAGAAAATGTCTATCCAGTAAGTATCTCTGGGAGAC | 73.8   |                  |
| <b><u>Luciferase-reporter assay constructs</u></b> |                                                             |                                          |        |                  |
| <i>RPE65_XS_Intron 1.1_Fwd</i>                     | <u>ACTGGAAGAAAATGTCTATCCAGTAACCTTGGCAACA</u>                | ACTGGAAGAAAATGTCTATCCA                   | 58.0   | 5,508            |
| <i>RPE65_XS_5'UTR_Rev</i>                          | CCTGGGTGTTGCCAAGGTTAC <u>ATTATCATGAATCC</u>                 | CCTGGGTGTTGCCAAGGTTAC                    | 60.0   |                  |
| <i>RPE65_S_Intron 1_Fwd</i>                        | CACCTTCATGGATTCATGATAAAT <u>GTAACCTTGGCAACA</u>             | CACCTTCATGGATTCATGATAAAT                 | 58.0   | 5,561            |
| <i>RPE65_S_5'UTR_Rev</i>                           | CCTGGGTGTTGCCAAGGTTAC <u>ATTATCATGAATCC</u>                 | CCTGGGTGTTGCCAAGGTTAC                    | 60.0   |                  |
| <i>RPE65_M_Intron 2.1_Fwd</i>                      | CGCTACCTAATTGGAATTCCTCC <u>GTAACCTTGGCAACA</u>              | CGCTACCTAATTGGAATTCCTC                   | 60.0   | 6,992            |
| <i>RPE65_M_5'UTR_Rev</i>                           | CCTGGGTGTTGCCAAGGTTAC <u>ATTATCATGAATCC</u>                 | CCTGGGTGTTGCCAAGGTTAC                    | 60.0   |                  |
| <i>RPE65_L_Intron 2.2_Fwd</i>                      | ACTGTGAAAGCTGAGAGGCC <u>GTAACCTTGGCAACA</u>                 | ACTGTGAAAGCTGAGAGGCC                     | 60.0   | 8,056            |
| <i>RPE65_L_5'UTR_Rev</i>                           | CCTGGGTGTTGCCAAGGTTAC <u>ATTATCATGAATCC</u>                 | CCTGGGTGTTGCCAAGGTTAC                    | 60.0   |                  |
| <b><u>RT-PCR</u></b>                               |                                                             |                                          |        |                  |
| <i>RPE65_exon1_Fwd</i>                             | n/a                                                         | CTTCATTCTGCAGTTGGTGCC                    | 62.0   | 164              |
| <i>RPE65_exon3_Rev</i>                             | n/a                                                         | CCACATCGAAGGAGACTGCC                     | 58.0   |                  |
| <i>ACTB_exon3_Fwd</i>                              | n/a                                                         | ACTGGGACGACATGGAGAAG                     | 60.5   | 398              |
| <i>ACTB_exon3_Rev</i>                              | n/a                                                         | TCTCAGCTGTGGTGGTGAAG                     | 60.5   |                  |
| <b><u>qPCR</u></b>                                 |                                                             |                                          |        |                  |
| <i>OCT3/4_Fwd</i>                                  | n/a                                                         | GTTCTTCATTCACCTAAGGAAGG                  | 58.4   | 101              |
| <i>OCT3/4_Rev</i>                                  | n/a                                                         | CAAGAGCATCATTGAACCTCAC                   | 58.4   |                  |

|                   |     |                         |      |     |
|-------------------|-----|-------------------------|------|-----|
| <i>PAX6_Fwd</i>   | n/a | GCTGCAAAGAAATAGAACATCC  | 58.4 | 111 |
| <i>PAX6_Rv</i>    | n/a | TTGGCTGCTAGTCTTTCTCG    | 58.4 |     |
| <i>CRX_Fwd</i>    | n/a | CCCCAGTGTGGATCTGATG     | 59.5 | 116 |
| <i>CRX_Rv</i>     | n/a | CAAAACAGTGCTCCAGCTC     | 59.5 |     |
| <i>OPN1SW_Fwd</i> | n/a | TTCTTCTCCAAGAGTGCTTGC   | 59.5 | 97  |
| <i>OPN1SW_Rv</i>  | n/a | CCTTCCCACACACCATCTTC    | 60.5 |     |
| <i>BEST1_Fwd</i>  | n/a | TCAGTGTGGACACCTGTATGC   | 61.2 | 84  |
| <i>BEST1_Rv</i>   | n/a | AAGCTGTACACCGCCACAG     | 59.5 |     |
| <i>RPE65_Fwd</i>  | n/a | TTACTACGCTTGACAGAGACC   | 62.1 | 105 |
| <i>RPE65_Rv</i>   | n/a | GCCCCATTGACAGAGACATAG   | 61.2 |     |
| <i>MERTK_Fwd</i>  | n/a | TTGCAGCATTGAGTCAAGGAAGC | 65.2 | 106 |
| <i>MERTK_Rv</i>   | n/a | GGCTTGACGCTGCTTGATTGGTA | 65.2 |     |
| <i>DCT_Fwd</i>    | n/a | CTTTGCCGGCTATAATTGTG    | 56.4 | 101 |
| <i>DCT_Rv</i>     | n/a | TCAAGGAATGGATGTTCTGC    | 56.4 |     |
| <i>ABCA4_Fwd</i>  | n/a | CATCCTGTTCCACCACCTCA    | 60.5 | 113 |
| <i>ABCA4_Rv</i>   | n/a | CTGTGTCCTCCAACATGGCT    | 60.5 |     |
| <i>GUSB_Fwd</i>   | n/a | AGAGTGGTGCTGAGGATTGG    | 60.5 | 80  |
| <i>GUSB_Rv</i>    | n/a | CCCTCATGCTCTAGCGTGTC    | 62.5 |     |

Underlined sequences corresponded to tail/tag sequences. SDMut means side-directed mutagenesis. n/a means non-applicable for that primer.

**Table S2. List and combinations of antibodies used for immunocytochemistry.**

| Gene                        | Antibody Catalog #          | Manufacturer                       | Properties                  | Dilution                    |
|-----------------------------|-----------------------------|------------------------------------|-----------------------------|-----------------------------|
| <b>Primary antibodies</b>   |                             |                                    |                             |                             |
| BEST1                       | NB300-164                   | Novus Biologicals (CO, USA)        | Monoclonal, Mouse           | 1:200                       |
| EZRIN                       | E8897                       | Sigma-Aldrich                      | Monoclonal, Mouse           | 1:250                       |
| ZO-1                        | 40-2300                     | Invitrogen                         | Polyclonal, Rabbit          | 1:500                       |
| RPE65                       | MAB5428                     | Sigma-Aldrich                      | Monoclonal, Mouse           | 1:500                       |
| <b>Secondary antibodies</b> |                             |                                    |                             |                             |
| Goat anti-rabbit 488        | A11008                      | Molecular Probes (ORE, USA)        | Polyclonal                  | 1:500                       |
| Goat anti-mouse 568         | A11031                      | Life Technologies                  | Polyclonal                  | 1:500                       |
| <b>Others</b>               |                             |                                    |                             |                             |
| DAPI                        | 0100-20                     | Southern Biotechnologies (AL, USA) |                             | 1:300 (of a 1:100 dilution) |
| <b>Combinations</b>         |                             |                                    |                             |                             |
| <b>Antibody 1</b>           | <b>Secondary Antibody 1</b> | <b>Antibody 2</b>                  | <b>Secondary antibody 2</b> | <b>DAPI</b>                 |
| ZO-1                        | Goat anti-rabbit 488        | BEST1                              | Goat anti-mouse 568         | Yes                         |
| ZO-1                        | Goat anti-rabbit 488        | EZRIN                              | Goat anti-mouse 568         | Yes                         |
| ZO-1                        | Goat anti-rabbit 488        | RPE65                              | Goat anti-mouse 568         | Yes                         |

**Table S3. List of antibodies used for Western blot analysis study**

| Primary antibodies   | Target protein | Produced by        | Antibody Catalog # | Host                   | Diluent                    | WB dilution |
|----------------------|----------------|--------------------|--------------------|------------------------|----------------------------|-------------|
|                      | RPE65          | Sigma-Aldrich      | MAB5428            | Mouse (Monoclonal)     | WestVisionTM block diluent | 1:1000      |
|                      | Histone H3     | Abcam              | ab32356            | Rabbit (Monoclonal)    | WestVisionTM block diluent | 1:1000      |
|                      | MERTK (Y323)   | Abcam              | ab52968            | Rabbit (Monoclonal)    | WestVisionTM block diluent | 1:1000      |
| Secondary antibodies | Target host    | Produced by        | Antibody Catalog # | Host / Fluorophore     | Diluent                    | WB dilution |
|                      | Rabbit         | Molecular Probes   | A21076             | Goat / Alexa Fluor 680 | WestVisionTM block diluent | 1:10000     |
|                      | Mouse          | Li-Cor Biosciences | 926-32210          | Goat / IRDye800        | WestVisionTM block diluent | 1:20000     |

**Table S4. Summary of the protein analysis of the ~35 kDa and 65 kDa protein band from the IP of RPE65.** The last two columns represent the total intensity of the detected peptide sequence from lower intensity (in red) to higher intensity (green), yellow colours indicate intermediate intensity. In bold, RPE65 protein which have an intensity affinity with the 65-kDa protein as expected. Proteins with coverage lower than 5.0, probability or top peptide probability lower than 0.999 and/or highest intensity for both bands lower than 50,000 were discarded during the filtrating process.

| Protein ID | Entry Name  | Gene      | Protein Length | Coverage | Organism             | Protein Existence                        | Protein Probability | Top Peptide Probability | 35 Total Intensity | 65 Total Intensity |
|------------|-------------|-----------|----------------|----------|----------------------|------------------------------------------|---------------------|-------------------------|--------------------|--------------------|
| O43852     | CALU_HUMAN  | CALU      | 315            | 10.8     | Homo sapiens OX=9606 | 1:Experimental evidence at protein level | 1                   | 0.999                   | 93,961.51          | 0                  |
| P00505     | AATM_HUMAN  | GOT2      | 430            | 24.2     | Homo sapiens OX=9606 | 1:Experimental evidence at protein level | 1                   | 0.999                   | 162,246.56         | 24,242.09          |
| P02545     | LMNA_HUMAN  | LMNA      | 664            | 23.9     | Homo sapiens OX=9606 | 1:Experimental evidence at protein level | 1                   | 0.999                   | 0                  | 105,971.945        |
| P02768     | ALBU_HUMAN  | ALB       | 609            | 11.8     | Homo sapiens OX=9606 | 1:Experimental evidence at protein level | 1                   | 0.999                   | 2,501,452          | 5,493,824          |
| P04406     | G3P_HUMAN   | GAPDH     | 335            | 13.1     | Homo sapiens OX=9606 | 1:Experimental evidence at protein level | 1                   | 0.999                   | 67,913.35          | 7,994.7446         |
| P04843     | RPN1_HUMAN  | RPN1      | 607            | 11.5     | Homo sapiens OX=9606 | 1:Experimental evidence at protein level | 1                   | 0.999                   | 0                  | 80,513.95          |
| P10809     | CH60_HUMAN  | HSPD1     | 573            | 25       | Homo sapiens OX=9606 | 1:Experimental evidence at protein level | 1                   | 0.999                   | 0                  | 113,916.625        |
| P11166     | GTR1_HUMAN  | SLC2A1    | 492            | 12.4     | Homo sapiens OX=9606 | 1:Experimental evidence at protein level | 1                   | 0.999                   | 345,835            | 56,481.434         |
| P29401     | TKT_HUMAN   | TKT       | 623            | 27.1     | Homo sapiens OX=9606 | 1:Experimental evidence at protein level | 1                   | 0.999                   | 0                  | 203,020.9          |
| P38646     | GRP75_HUMAN | HSPA9     | 679            | 25.2     | Homo sapiens OX=9606 | 1:Experimental evidence at protein level | 1                   | 0.999                   | 0                  | 279,579.03         |
| P39656     | OST48_HUMAN | DDOST     | 456            | 8.6      | Homo sapiens OX=9606 | 1:Experimental evidence at protein level | 1                   | 0.999                   | 57,738.64          | 0                  |
| Q07065     | CKAP4_HUMAN | CKAP4     | 602            | 30.4     | Homo sapiens OX=9606 | 1:Experimental evidence at protein level | 1                   | 0.999                   | 0                  | 133,184.78         |
| Q9NPH2     | INO1_HUMAN  | ISYNA1    | 558            | 7        | Homo sapiens OX=9606 | 1:Experimental evidence at protein level | 1                   | 0.999                   | 0                  | 67,233.82          |
| A0A075B6S2 | KVD29_HUMAN | IGKV2D-29 | 120            | 16.7     | Homo sapiens OX=9606 | 3:Protein inferred from homology         | 1                   | 0.999                   | 700,050.06         | 128,539.875        |

|        |             |        |     |      |                      |                                          |        |       |             |             |
|--------|-------------|--------|-----|------|----------------------|------------------------------------------|--------|-------|-------------|-------------|
| O75874 | IDHC_HUMAN  | IDH1   | 414 | 10.1 | Homo sapiens OX=9606 | 1:Experimental evidence at protein level | 1      | 0.999 | 104,416.69  | 0           |
| O94905 | ERLN2_HUMAN | ERLIN2 | 339 | 14.2 | Homo sapiens OX=9606 | 1:Experimental evidence at protein level | 1      | 0.999 | 174,234.78  | 0           |
| P00558 | PGK1_HUMAN  | PGK1   | 417 | 30.7 | Homo sapiens OX=9606 | 1:Experimental evidence at protein level | 1      | 0.999 | 164,836.4   | 0           |
| P01859 | IGHG2_HUMAN | IGHG2  | 326 | 16.3 | Homo sapiens OX=9606 | 1:Experimental evidence at protein level | 1      | 0.999 | 67,411.27   | 29,636.666  |
| P01857 | IGHG1_HUMAN | IGHG1  | 330 | 13.3 | Homo sapiens OX=9606 | 1:Experimental evidence at protein level | 1      | 0.999 | 86,852.52   | 79,244.375  |
| P02790 | HEMO_HUMAN  | HPX    | 462 | 15.4 | Homo sapiens OX=9606 | 1:Experimental evidence at protein level | 1      | 0.999 | 0           | 193,785.7   |
| P04075 | ALDOA_HUMAN | ALDOA  | 364 | 38.5 | Homo sapiens OX=9606 | 1:Experimental evidence at protein level | 1      | 0.999 | 95,4295.2   | 0           |
| P09972 | ALDOC_HUMAN | ALDOC  | 364 | 8.2  | Homo sapiens OX=9606 | 1:Experimental evidence at protein level | 0.9995 | 0.999 | 117,448.11  | 0           |
| P04264 | K2C1_HUMAN  | KRT1   | 644 | 55   | Homo sapiens OX=9606 | 1:Experimental evidence at protein level | 1      | 0.999 | 2,632,790.8 | 2,522,892.5 |
| P35908 | K22E_HUMAN  | KRT2   | 639 | 51.2 | Homo sapiens OX=9606 | 1:Experimental evidence at protein level | 1      | 0.999 | 1,435,906   | 1,496,954   |
| P13647 | K2C5_HUMAN  | KRT5   | 590 | 28.3 | Homo sapiens OX=9606 | 1:Experimental evidence at protein level | 1      | 0.999 | 986,652.44  | 560,298.8   |
| P02538 | K2C6A_HUMAN | KRT6A  | 564 | 30.1 | Homo sapiens OX=9606 | 1:Experimental evidence at protein level | 1      | 0.999 | 1,063,048   | 846,167.06  |
| P04259 | K2C6B_HUMAN | KRT6B  | 564 | 26.8 | Homo sapiens OX=9606 | 1:Experimental evidence at protein level | 1      | 0.999 | 1,531,210.5 | 1,464,059.1 |
| P11142 | HSP7C_HUMAN | HSPA8  | 646 | 39.9 | Homo sapiens OX=9606 | 1:Experimental evidence at protein level | 1      | 0.999 | 0           | 536,350.4   |
| P0DMV8 | HS71A_HUMAN | HSPA1A | 641 | 21.8 | Homo sapiens OX=9606 | 1:Experimental evidence at protein level | 1      | 0.999 | 0           | 406,626.2   |
| P13645 | K1C10_HUMAN | KRT10  | 584 | 48.1 | Homo sapiens OX=9606 | 1:Experimental evidence at protein level | 1      | 0.999 | 1,595,172.6 | 1,333,126.6 |
| P35527 | K1C9_HUMAN  | KRT9   | 623 | 43.7 | Homo sapiens OX=9606 | 1:Experimental evidence at protein level | 1      | 0.999 | 1,872,941.2 | 1,926,071.8 |
| P08727 | K1C19_HUMAN | KRT19  | 400 | 61   | Homo sapiens OX=9606 | 1:Experimental evidence at protein level | 1      | 0.999 | 984,447.1   | 415,205.28  |
| P02533 | K1C14_HUMAN | KRT14  | 472 | 44.5 | Homo sapiens OX=9606 | 1:Experimental evidence at protein level | 1      | 0.999 | 1,072,700   | 816,618.3   |
| Q04695 | K1C17_HUMAN | KRT17  | 432 | 24.8 | Homo sapiens OX=9606 | 1:Experimental evidence at protein level | 1      | 0.999 | 984,447.1   | 415,205.28  |

|               |                    |              |            |             |                             |                                                 |          |              |                  |                  |
|---------------|--------------------|--------------|------------|-------------|-----------------------------|-------------------------------------------------|----------|--------------|------------------|------------------|
| P08779        | K1C16_HUMAN        | KRT16        | 473        | 24.3        | Homo sapiens OX=9606        | 1:Experimental evidence at protein level        | 1        | 0.999        | 1,072,700        | 816,618.3        |
| P14618        | KPYM_HUMAN         | PKM          | 531        | 27.1        | Homo sapiens OX=9606        | 1:Experimental evidence at protein level        | 1        | 0.999        | 0                | 254,464.88       |
| P16403        | H12_HUMAN          | H1-2         | 213        | 25.4        | Homo sapiens OX=9606        | 1:Experimental evidence at protein level        | 1        | 0.999        | 115,079.92       | 89,869.164       |
| P10412        | H14_HUMAN          | H1-4         | 219        | 24.7        | Homo sapiens OX=9606        | 1:Experimental evidence at protein level        | 1        | 0.999        | 135,708.25       | 82,180.445       |
| P39023        | RL3_HUMAN          | RPL3         | 403        | 12.9        | Homo sapiens OX=9606        | 1:Experimental evidence at protein level        | 1        | 0.999        | 109,001.164      | 3,278.821        |
| P42025        | ACTY_HUMAN         | ACTR1B       | 376        | 9.6         | Homo sapiens OX=9606        | 1:Experimental evidence at protein level        | 1        | 0.999        | 76,152.51        | 0                |
| P63261        | ACTG_HUMAN         | ACTG1        | 375        | 77.9        | Homo sapiens OX=9606        | 1:Experimental evidence at protein level        | 1        | 0.999        | 2.61E+07         | 177,051.66       |
| P60709        | ACTB_HUMAN         | ACTB         | 375        | 77.9        | Homo sapiens OX=9606        | 1:Experimental evidence at protein level        | 1        | 0.999        | 2.61E+07         | 177,051.66       |
| P68032        | ACTC_HUMAN         | ACTC1        | 377        | 46.7        | Homo sapiens OX=9606        | 1:Experimental evidence at protein level        | 1        | 0.999        | 2.51E+07         | 174,650.2        |
| P61160        | ARP2_HUMAN         | ACTR2        | 394        | 21.1        | Homo sapiens OX=9606        | 1:Experimental evidence at protein level        | 1        | 0.999        | 133,726.66       | 0                |
| Q15019        | SEPT2_HUMAN        | SEPTIN2      | 361        | 12.5        | Homo sapiens OX=9606        | 1:Experimental evidence at protein level        | 1        | 0.999        | 92,480.19        | 0                |
| <b>Q16518</b> | <b>RPE65_HUMAN</b> | <b>RPE65</b> | <b>533</b> | <b>22.7</b> | <b>Homo sapiens OX=9606</b> | <b>1:Experimental evidence at protein level</b> | <b>1</b> | <b>0.999</b> | <b>4,680.633</b> | <b>904,031.3</b> |
| Q53GT1        | KLH22_HUMAN        | KLHL22       | 634        | 23.7        | Homo sapiens OX=9606        | 1:Experimental evidence at protein level        | 1        | 0.999        | 0                | 196,319.53       |
| Q9NYL9        | TMOD3_HUMAN        | TMOD3        | 352        | 44.6        | Homo sapiens OX=9606        | 1:Experimental evidence at protein level        | 1        | 0.999        | 499,725.06       | 6,141.5503       |

## Supplementary figures

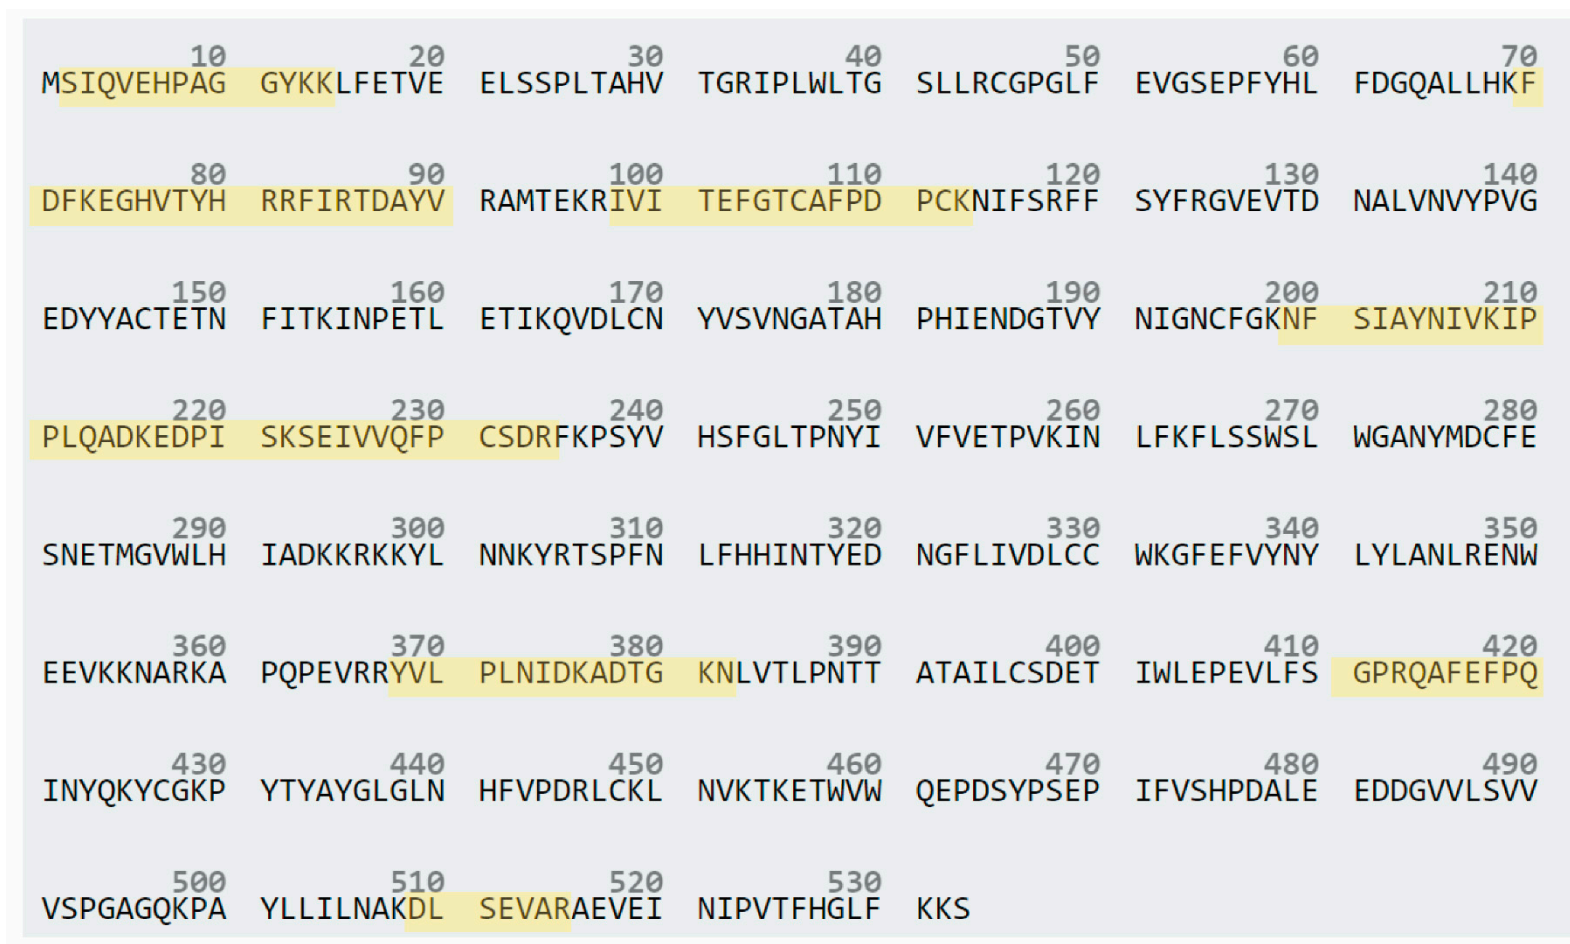

**Figure S1. Peptide coverage of RPE65 in for the 65 kDa band.** Peptides found by mass spectrometry after in-gel digestion of immunoprecipitating the ~35 kDa and 65 kDa bands. In yellow, coverage of peptide sequences of the 65 kDa band mapped on RPE65 protein sequence obtained from Uniprot (Q16518)



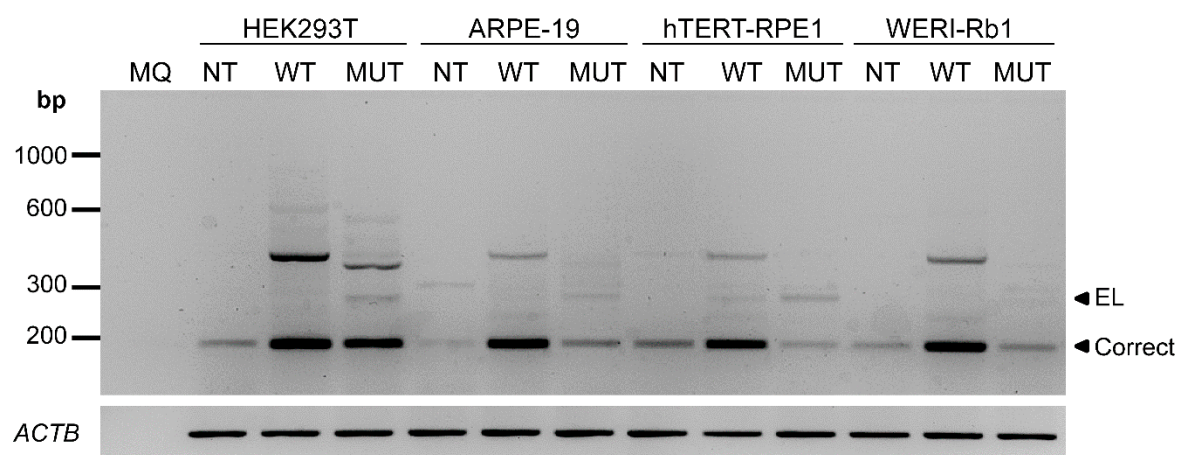

**Figure S2. RT-PCR from exon 1 to 3 of the *RPE65* entry clones in different cell lines.** A) Splice assays in HEK293T, ARPE-19, hTERT-RPE1 and Weri-Rb1. Representative electrophoresis gel (n=2) of the RT-PCR product after amplifying exon 1 to 3 of *RPE65* comparing wild-type (WT) and mutant (MUT) expression vectors. MQ: miliQ water; NT: non-transfected; EL: exon elongation; Correct: wild-type transcript; bp: base-pairs.
